# Supplementary material
Source: publisher site journal article supplement (https://www.dovepress.com/article/547839)
Supplement: Supplementary file 1 [file Supplementary%20Materials_1_1.docx]

**Supplementary Materials**

**Supplementary Table S1**. Variance inflation factor

**Supplementary Table S2.** Characteristics of Study Participants Before and After Propensity Score Matching

**Supplementary Table S3.** Multivariable Logistic Regression Analysis of the study After Propensity Score Matching

**Supplementary Table S1**. Variance inflation factor.

| **Variable** | **VIF** |
| --- | --- |
| Age | 1.511 |
| Race | 1.109 |
| Education level | 1.464 |
| Marital status | 1.239 |
| PIR | 1.389 |
| Smoking | 1.144 |
| Alcohol status | 1.197 |
| HBP | 1.010 |
| Diabetes | 1.109 |
| Birth control pill | 1.108 |
| Hormone | 1.210 |

**Supplementary Table S2.** Characteristics of Study Participants Before and After Propensity Score Matching

|  | Before Matching | | | After Matching | | |
| --- | --- | --- | --- | --- | --- | --- |
| **Characteristic** | **0**  N = 3311 | **1**  N = 3311 | **p-value**2 | **0**  N = 3311 | **1**  N = 3311 | **p-value**2 |
| Age | 53.9 ± 16.5 | 53.7 ± 15.4 | 0.911 | 53.9 ± 16.5 | 53.7 ± 15.4 | 0.911 |
| Race |  |  | 0.901 |  |  | 0.901 |
| Mexican American | 48 (15%) | 45 (14%) |  | 48 (15%) | 45 (14%) |  |
| Non-Hispanic White | 25 (7.6%) | 32 (9.7%) |  | 25 (7.6%) | 32 (9.7%) |  |
| Non-Hispanic Black | 195 (59%) | 194 (59%) |  | 195 (59%) | 194 (59%) |  |
| Other Race | 39 (12%) | 38 (11%) |  | 39 (12%) | 38 (11%) |  |
| Mexican American | 24 (7.3%) | 22 (6.6%) |  | 24 (7.3%) | 22 (6.6%) |  |
| Education level |  |  | 0.759 |  |  | 0.759 |
| <High school diploma | 42 (13%) | 36 (11%) |  | 42 (13%) | 36 (11%) |  |
| High school diploma/equivalent | 61 (18%) | 62 (19%) |  | 61 (18%) | 62 (19%) |  |
| >High school diploma | 68 (21%) | 80 (24%) |  | 68 (21%) | 80 (24%) |  |
| <High school diploma | 115 (35%) | 114 (34%) |  | 115 (35%) | 114 (34%) |  |
| High school diploma/equivalent | 45 (14%) | 39 (12%) |  | 45 (14%) | 39 (12%) |  |
| Marital status |  |  | 0.932 |  |  | 0.932 |
| Married/cohabitation | 146 (44%) | 144 (44%) |  | 146 (44%) | 144 (44%) |  |
| Widow/divorce/separation | 54 (16%) | 57 (17%) |  | 54 (16%) | 57 (17%) |  |
| Unmarried | 63 (19%) | 65 (20%) |  | 63 (19%) | 65 (20%) |  |
| Married/cohabitation | 16 (4.8%) | 16 (4.8%) |  | 16 (4.8%) | 16 (4.8%) |  |
| Widow/divorce/separation | 35 (11%) | 28 (8.5%) |  | 35 (11%) | 28 (8.5%) |  |
| Unmarried | 17 (5.1%) | 21 (6.3%) |  | 17 (5.1%) | 21 (6.3%) |  |
| PIR | 2.1 ± 1.5 | 2.1 ± 1.5 | 0.945 | 2.1 ± 1.5 | 2.1 ± 1.5 | 0.945 |
| Smoking |  |  | 0.631 |  |  | 0.631 |
| Never | 134 (40%) | 146 (44%) |  | 134 (40%) | 146 (44%) |  |
| Former | 75 (23%) | 72 (22%) |  | 75 (23%) | 72 (22%) |  |
| Current | 122 (37%) | 113 (34%) |  | 122 (37%) | 113 (34%) |  |
| Alcohol status |  |  | 0.120 |  |  | 0.120 |
| yes | 227 (69%) | 207 (63%) |  | 227 (69%) | 207 (63%) |  |
| no | 104 (31%) | 124 (37%) |  | 104 (31%) | 124 (37%) |  |
| HBP |  |  | 0.616 | 330 (100%) | 328 (99%) | 0.616 |
| no | 1 (0.3%) | 3 (0.9%) |  |  |  |  |
| yes | 330 (100%) | 328 (99%) |  |  |  |  |
| Diabetes |  |  | 0.927 | 80 (24%) | 78 (24%) | 0.927 |
| no | 251 (76%) | 253 (76%) |  |  |  |  |
| yes | 80 (24%) | 78 (24%) |  |  |  |  |
| Birth control pill |  |  | 0.728 |  |  | 0.728 |
| no | 242 (73%) | 237 (72%) |  | 242 (73%) | 237 (72%) |  |
| yes | 89 (27%) | 94 (28%) |  | 89 (27%) | 94 (28%) |  |
| Hormone |  |  | 1.000 | 114 (34%) | 115 (35%) | 1.000 |
| no | 217 (66%) | 216 (65%) |  |  |  |  |
| yes | 114 (34%) | 115 (35%) |  |  |  |  |
| 1t-test for continuous variables; Chi-square test for categorical variables | | | | | | |
| 2Welch Two Sample t-test; Pearson's Chi-squared test | | | | | | |

**Supplementary Table S3.** Multivariable Logistic Regression Analysis of the study After Propensity Score Matching

| Model 3 | OR | 95% CI | p-value |
| --- | --- | --- | --- |
| PA group |  |  |  |
| Inactive | — | — |  |
| Insufficiently active | 0.62 | 0.39, 0.96 | 0.034 |
| Weekend warrior | 2.01 | 0.76, 5.93 | 0.2 |
| Regularly active | 0.69 | 0.48, 1.01 | 0.055 |

Abbreviations: CI = Confidence Interval, OR = Odds Ratio

Adjusted for age, race, education level, marital status, PIR, smoking, alcohol status, HBP, diabetes, birth control pill, hormone
